# Supplementary material
Source: Springer Nature journal article supplement (https://www.springermedizin.de/resource/supplementary/12913_2014_3466_MOESM4_ESM.pdf/9532916)
Supplement: MOESM4 [file 9532916]

You are coming to the end of your current post and you are looking for your next job. The Ministry of Health has sent you a summary of your next post, but you have also seen an advertisement for a job in the newspaper. You compare the two job descriptions:

*Generic (unlabelled) design*

|                         | <b>JOB A</b>  | <b>JOB B</b>  |
|-------------------------|---------------|---------------|
| <i>Attribute</i>        |               |               |
| <b>MONTHLY SALARY</b>   | BASIC         | 20% INCREASE  |
| <b>LOCATION</b>         | URBAN         | RURAL         |
| <b>WORKLOAD</b>         | HIGH          | LOW           |
| <b>HOUSING</b>          | PROVIDED      | NOT PROVIDED  |
| <b>FURTHER TRAINING</b> | AFTER 5 YEARS | AFTER 2 YEARS |

Which job would you take?

Job A  Job B

Take neither

*Opt-out option*

*Levels of attribute*
